# Supplementary material for: Comprehensive characterization of RAS mutations in colon and rectal cancers in old and young patients
Source: PubMed Central journal article supplement (PMC6700103; doi:10.1038/s41467-019-11530-0), 2019-08-19
Supplement: 41467_2019_11530_MOESM1_ESM.pdf [file 41467_2019_11530_MOESM1_ESM.pdf]

Comprehensive characterization of *RAS* mutations in colon and rectal cancers in old and young patients

Supplementary Information

Serebriiskii et al.

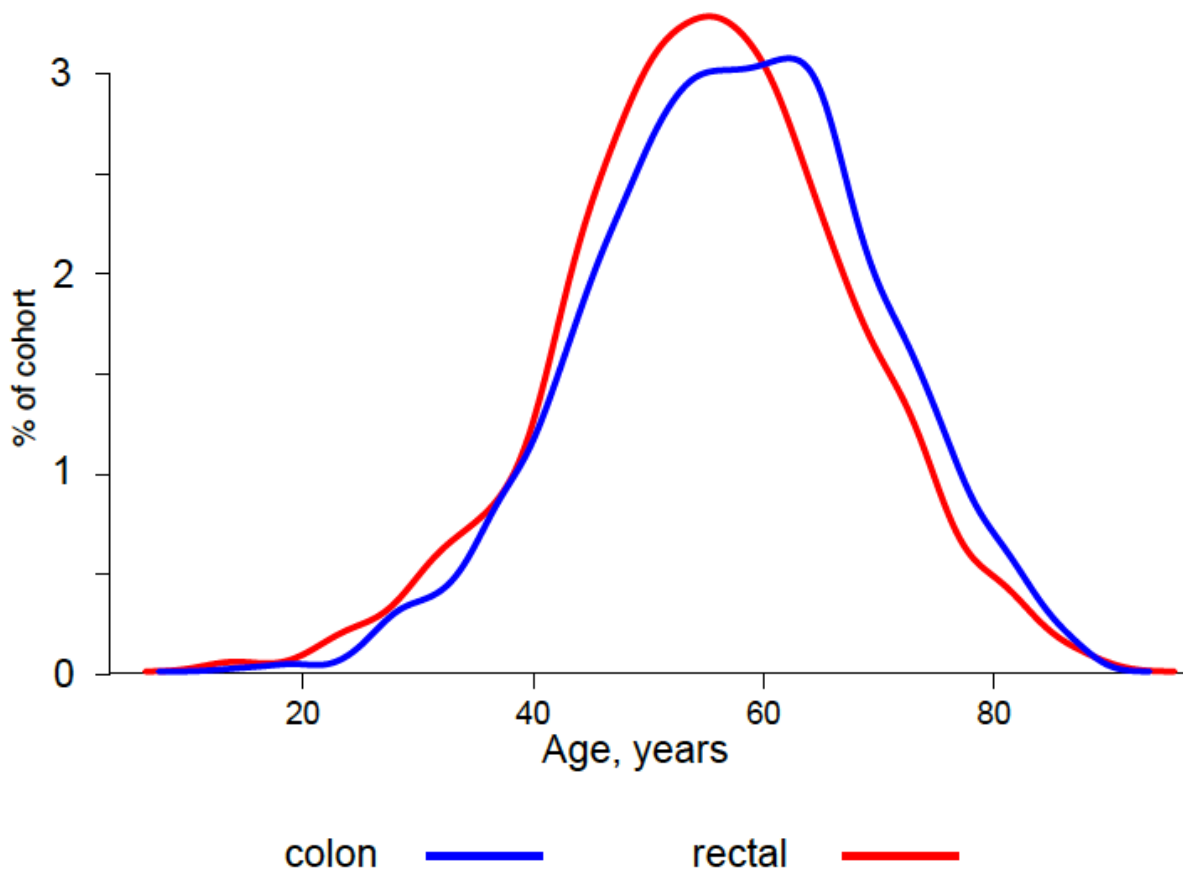

**Supplementary Figure 1. Age distribution of colon and rectal patients in this study.** The age distribution of individuals in this study reflects slightly earlier onset of rectal cancer compared to colon cancer.

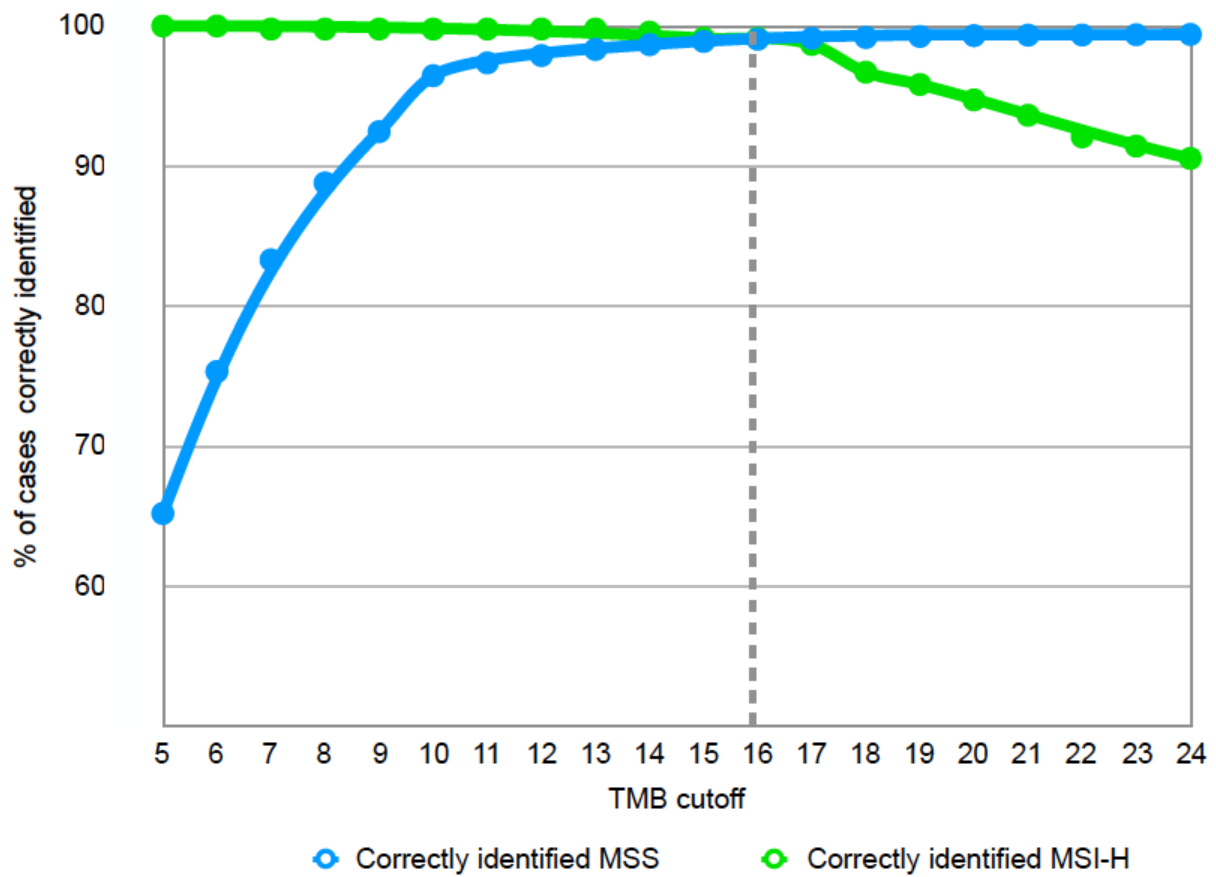

**Supplementary Figure 2. Selection of MSI-H/MSS status based on Tumor Mutation Burden (TMB).** Graph indicates % cases of MSH-H (red line) versus MSS (blue line) status identified in training set based on presence of indicated number of mutations in specimen. A cutpoint of 16 mutations was used to segregate the groups as MT-H or MT-L.

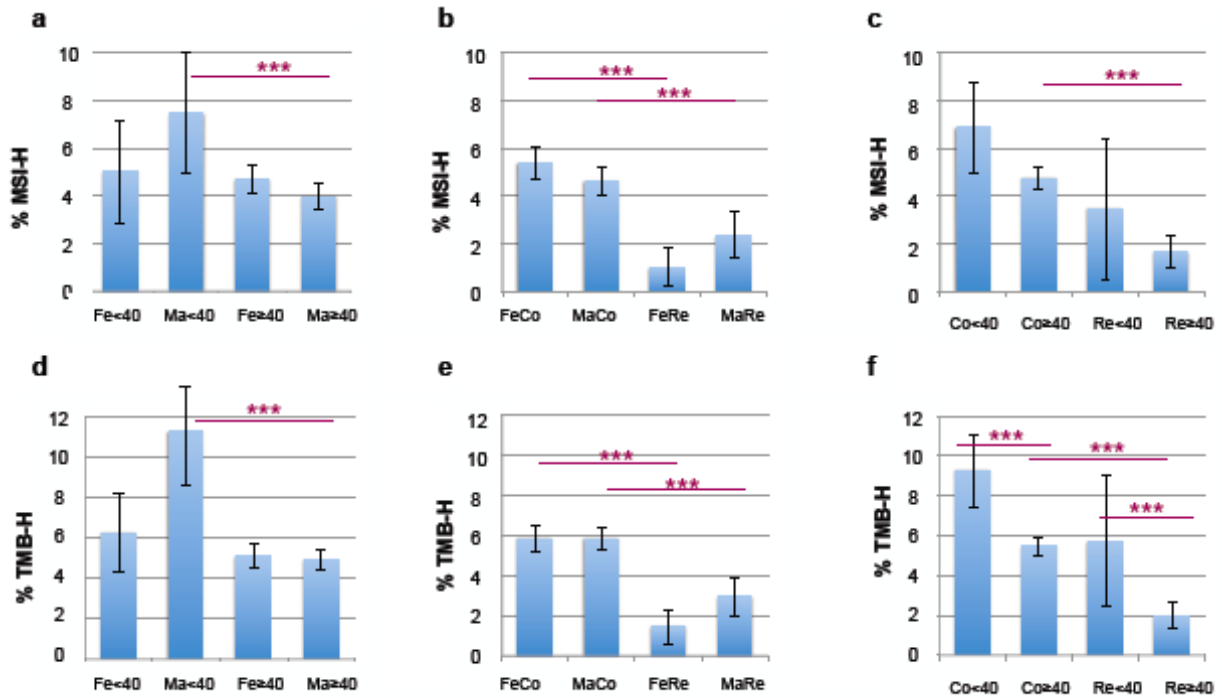

**Supplementary Figure 3. Overall profile of dataset, MSI-H and TMB.** Frequency of MSI-H (a-c) or TMB-H (d-f) tumors based on parameters of gender (Fe, female or Ma, male) as a factor of age (<40 or ≥40) (a,d), or primary tumor site (Co, colon or Re, rectum) (b, e); or in combined genders, based on age and tumor site (c, f). Error bars, 95% confidence intervals. Statistical significance is denoted by \*\*\*,  $p < 0.005$ .

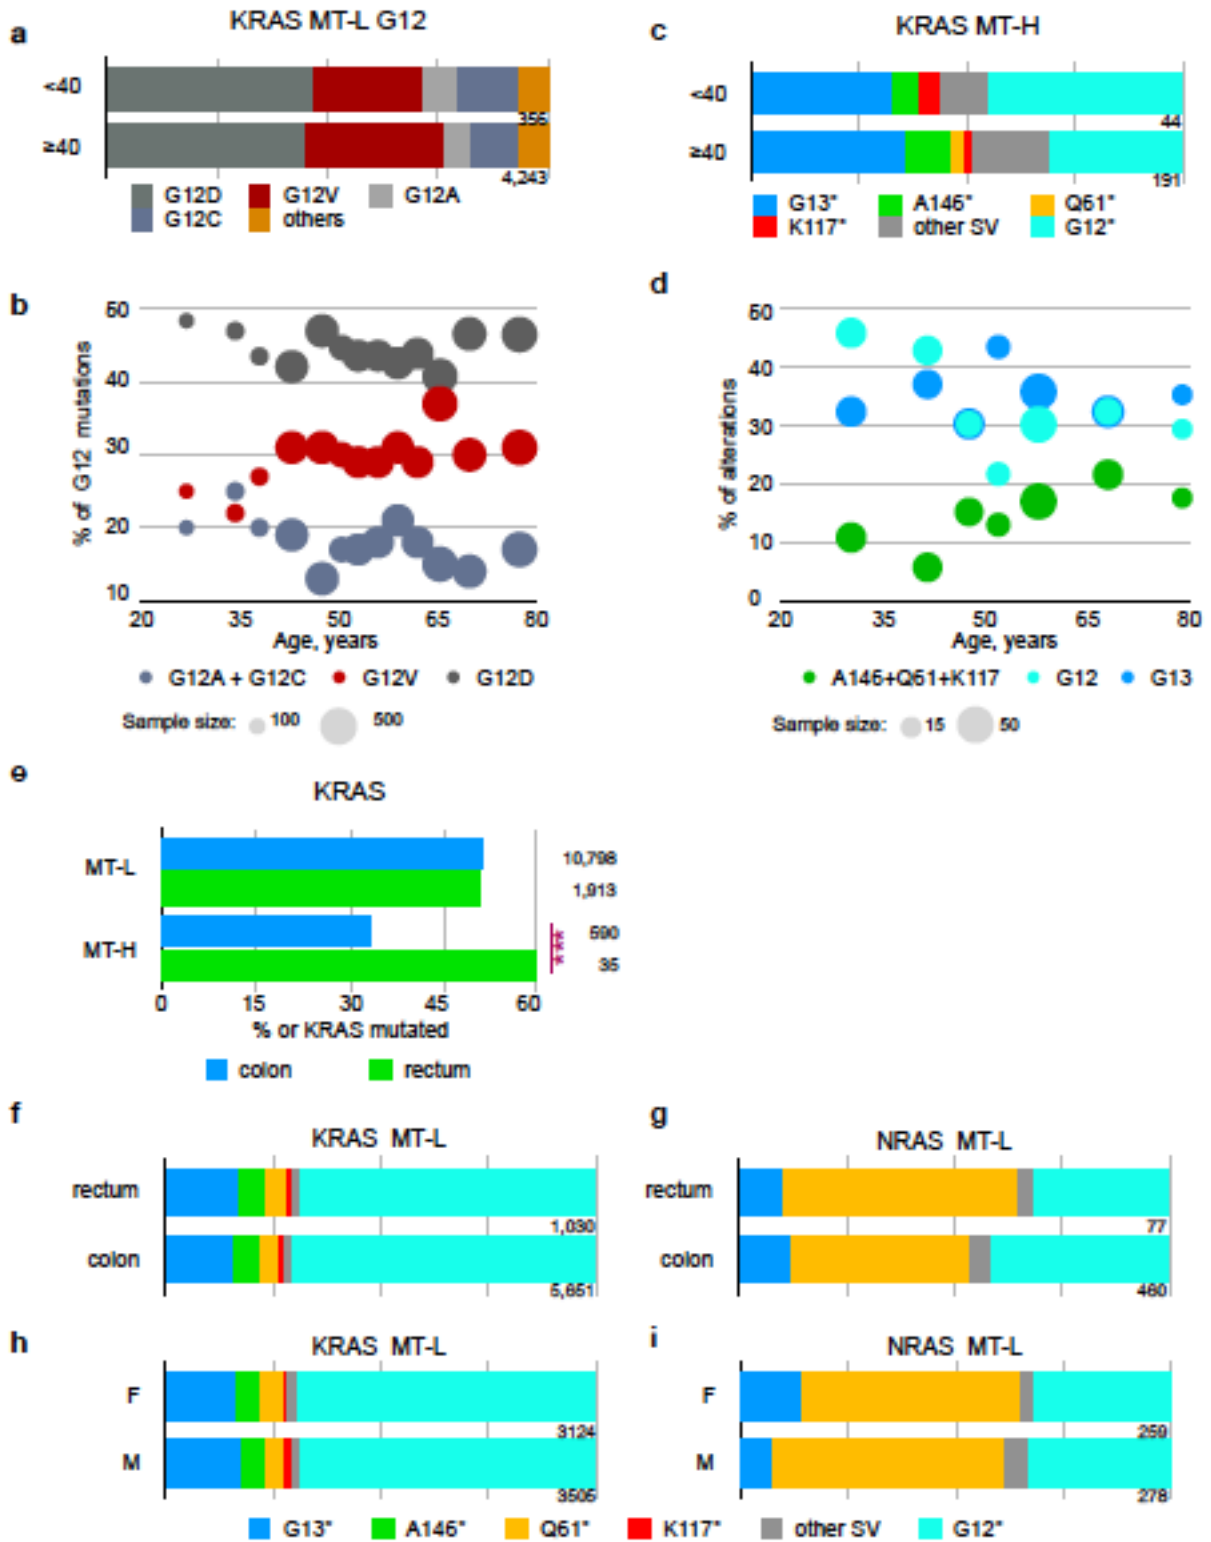

Supplementary Figure 4. Additional comparisons of mutational spectrum in *RAS* genes. a, b. Frequency of specific missense mutations *KRAS* G12 in MT-L CRC patients dichotomized by age

age (<40 or ≥40) (**a**) or with age considered as a continuous variable (**b**). **c, d**. Frequency of mutations in the indicated codons in *KRAS* in MT-H patients dichotomized by age (<40 or ≥40) (**c**) or with age considered as a continuous variable (**d**). For pale blue circles outlined in dark blue, G12 and G13 frequency is equivalent. **e**. Frequency of *KRAS* missense mutations in MT-L and MT-H tumors of the colon and rectum. **f, g**. Frequency of mutations in the indicated codons in *KRAS* (**f**) or *NRAS* (**g**) MT-L CRC based on tumor subsite (colon versus rectum). **h, i**. Frequency of mutations in the indicated codons in *KRAS* (**h**) or *NRAS* (**i**) MT-L CRC based on gender.
