# Supplementary material for: Comprehensive characterization of RAS mutations in colon and rectal cancers in old and young patients
Source: PubMed Central journal article supplement (PMC6700103; doi:10.1038/s41467-019-11530-0), 2019-08-19
Supplement: 41467_2019_11530_MOESM3_ESM.pdf [file 41467_2019_11530_MOESM3_ESM.pdf]

## **Description of Additional Supplementary Information**

File Name: Supplementary Data 1.

Description: Summary of protein and corresponding nucleotide changes resulting in KRAS and NRAS mutations. All recurrent nucleotide changes (found in the analyzed set at least four times), were retrieved. 38 mutations, with a combined total of 7435 occurrences, represent 97.3% of all structural variations in KRAS and/or NRAS genes in the dataset; information for the remaining 2.7% of rare changes are available on request. Four occurrences of different nucleotide changes resulting in the same amino acid changes, are highlighted.
